# Supplementary material for: Aerosol-assisted chemical vapor deposition of 2H-WS2 from single-source tungsten dithiolene precursors
Source: Royal Society of Chemistry journal article supplement (doi:10.1039/d3tc03755j), 2024-01-01
Supplement: d3tc03755j1.pdf [file d3tc03755j1.pdf]

## Aerosol-Assisted Chemical Vapor Deposition of 2H-WS<sub>2</sub> From Single-Source Tungsten Dithiolene Precursors

Ian M. Germaine, Nathaniel E. Richey, Mary B. Huttel and Lisa McElwee-White\*

Department of Chemistry, University of Florida, Gainesville, FL 32611-7200 USA

### *Electronic Supplementary Information*

#### Table of Contents

| Name                                                                                                                     | Page Number |
|--------------------------------------------------------------------------------------------------------------------------|-------------|
| <b>Figure S-1.</b> TGA-MS overlay for <b>2</b> .                                                                         | S-2         |
| <b>Figure S-2.</b> TGA-MS overlay for <b>3</b> .                                                                         | S-3         |
| <b>Figure S-3.</b> <sup>1</sup> H NMR spectrum (CDCl <sub>3</sub> , 400 MHz) of the pyrolysis condensate from <b>1</b> . | S-4         |
| <b>Figure S-4.</b> <sup>1</sup> H NMR spectrum (CDCl <sub>3</sub> , 400 MHz) of the pyrolysis condensate from <b>2</b> . | S-5         |
| <b>Figure S-5.</b> <sup>1</sup> H NMR spectrum (CDCl <sub>3</sub> , 400 MHz) of the pyrolysis condensate from <b>3</b> . | S-6         |
| <b>Figure S-6.</b> Cross-sectional SEM of the image deposited from <b>3</b> at 400 °C.                                   | S-7         |
| <b>Figure S-7.</b> Cross-sectional SEM image of the film deposited from <b>6</b> at 600 °C.                              | S-8         |
| <b>Figure S-8.</b> Plane view SEM of the film deposited from <b>3</b> at 400 °C.                                         | S-9         |
| <b>Figure S-9.</b> Plane view SEM of the film deposited from <b>3</b> at 500 °C.                                         | S-10        |

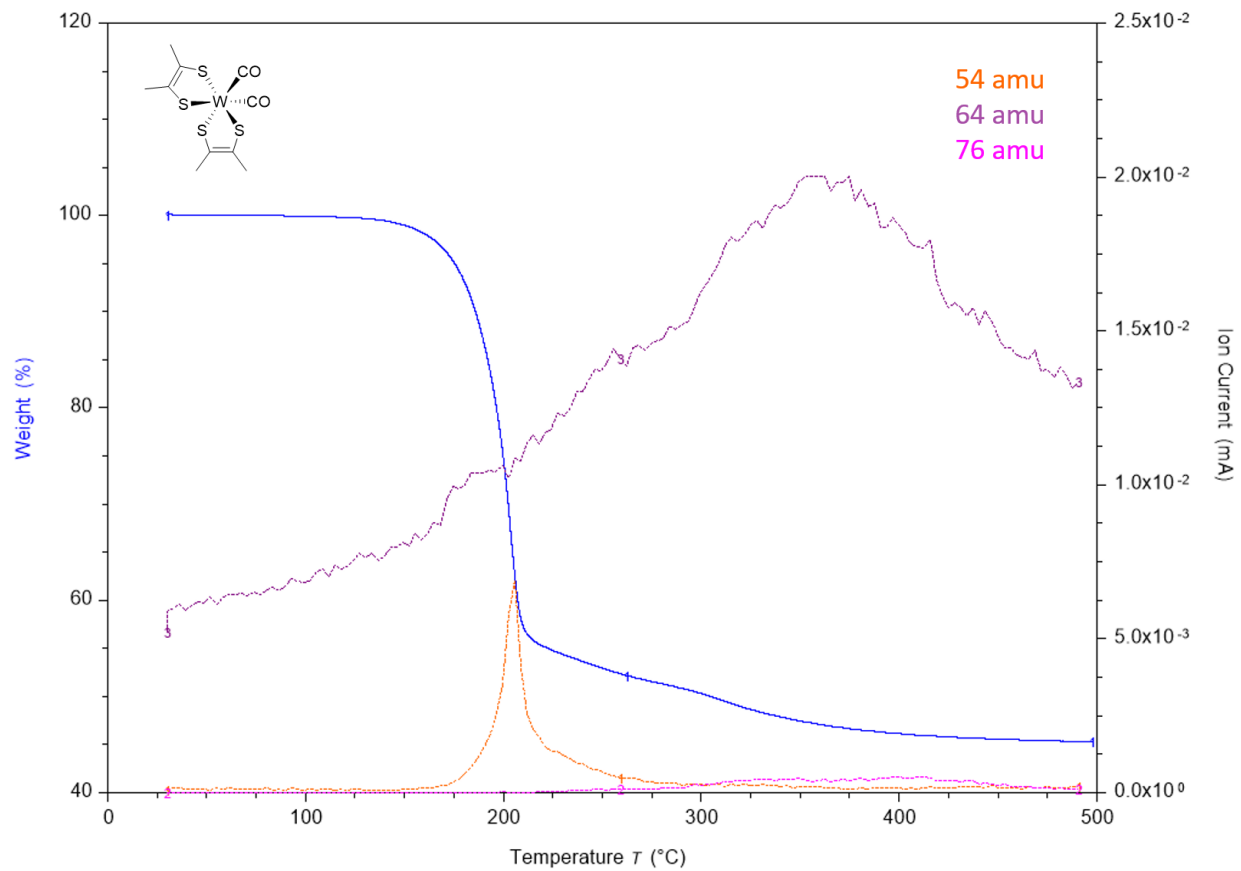

**Figure S-1.** TGA-MS overlay for **2**. The blue curve is the TGA trace for **2** (structure in top left).

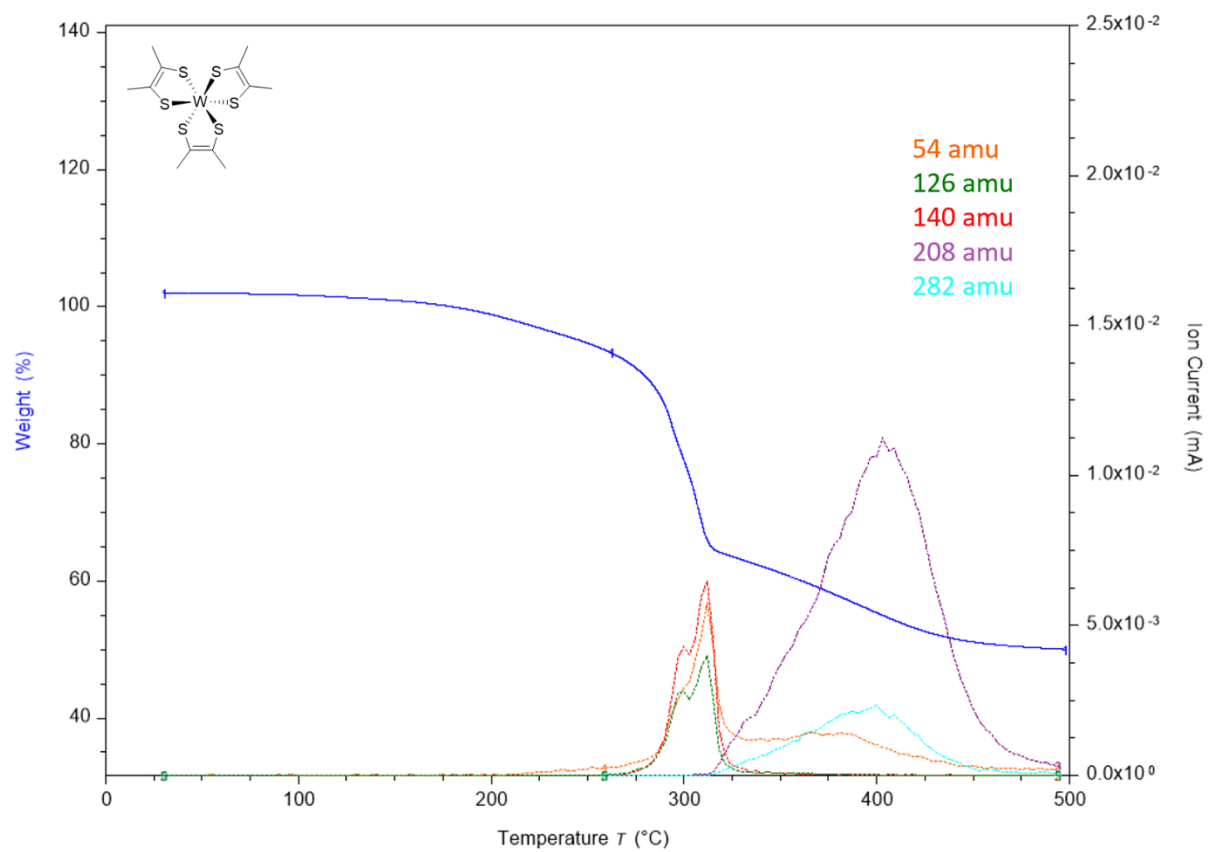

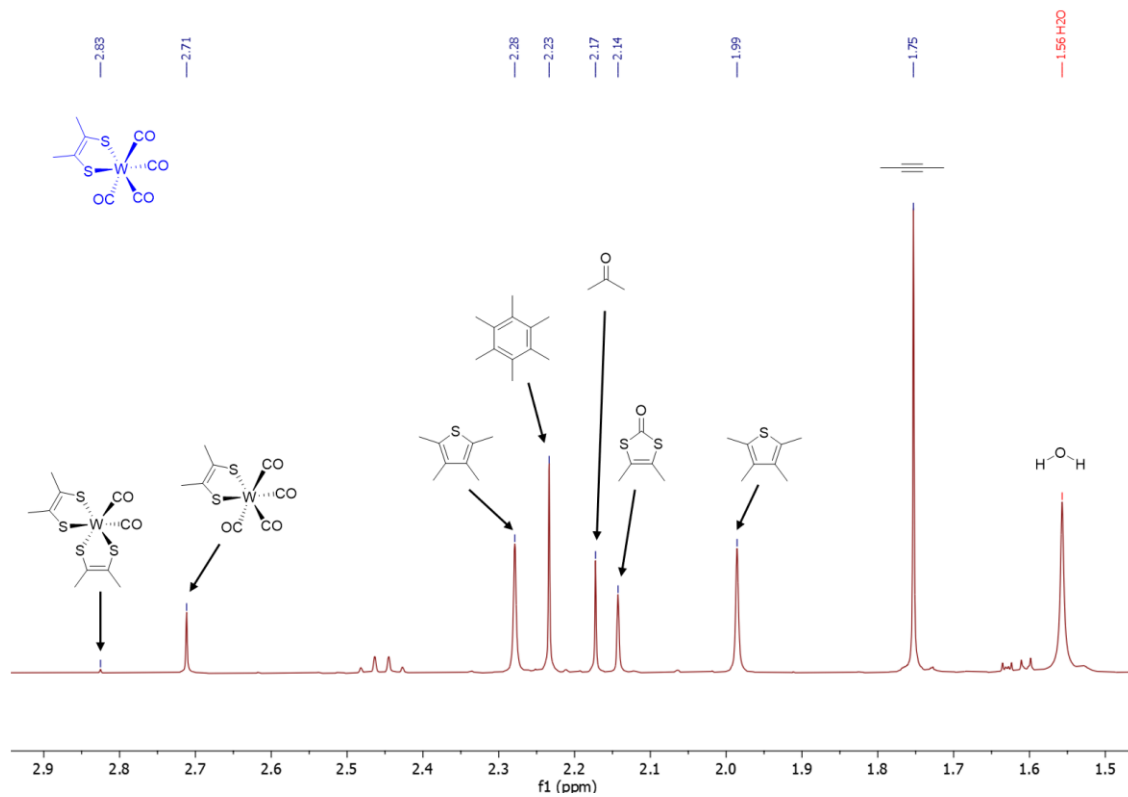

**Figure S-3.** <sup>1</sup>H NMR spectrum (CDCl<sub>3</sub>, 400 MHz) of the pyrolysis condensate from **1**. The structure of **1** is in the upper left corner (blue) and the major peaks are identified.

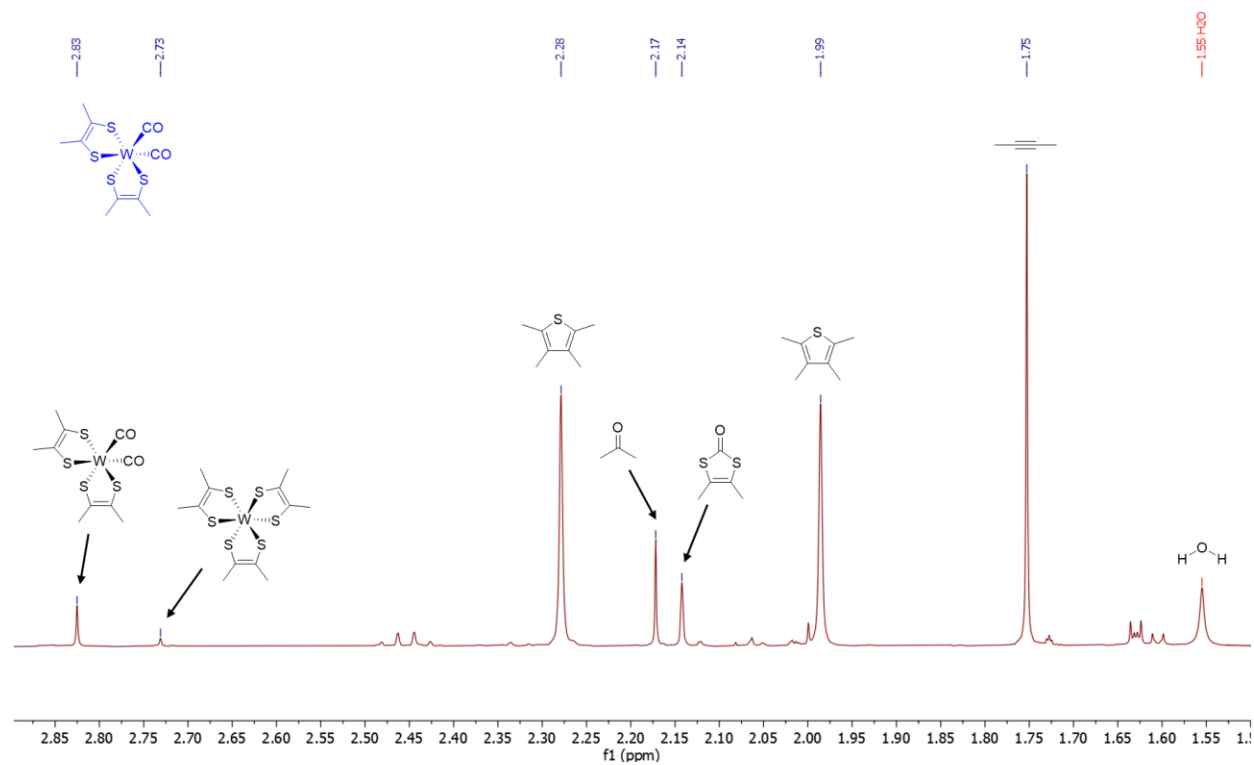

**Figure S-4.**  $^1\text{H}$  NMR spectrum ( $\text{CDCl}_3$ , 400 MHz) of the pyrolysis condensate from **2**. The structure of **2** is in the upper left corner (blue) and the major peaks are identified.

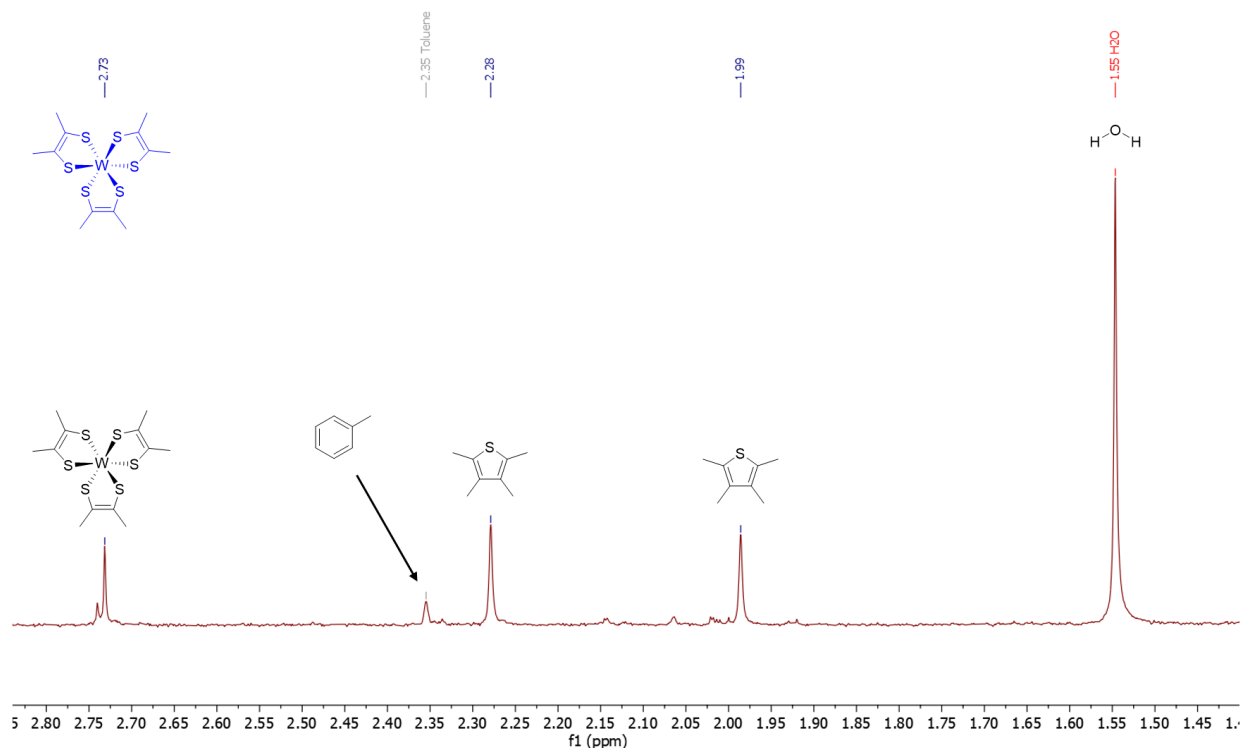

**Figure S-5.**  $^1\text{H}$  NMR spectrum ( $\text{CDCl}_3$ , 400 MHz) of the pyrolysis condensate from **3**. The structure of **3** is in the upper left corner (blue) and the major peaks are identified.

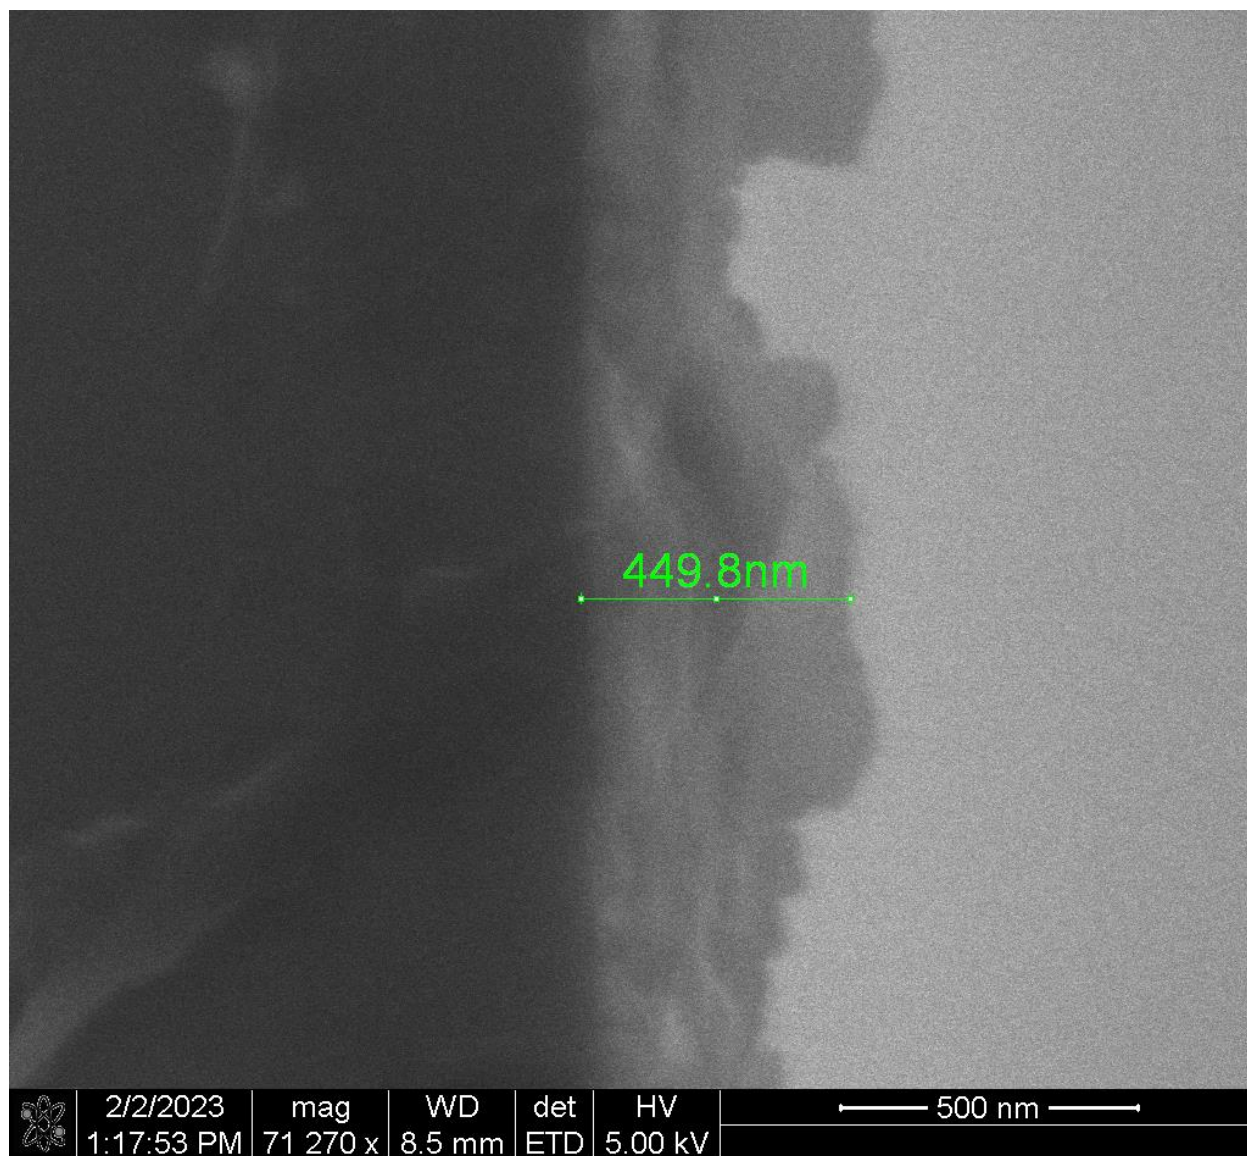

**Figure S-6.** Cross-sectional SEM of the image deposited from **3** at 400 °C.

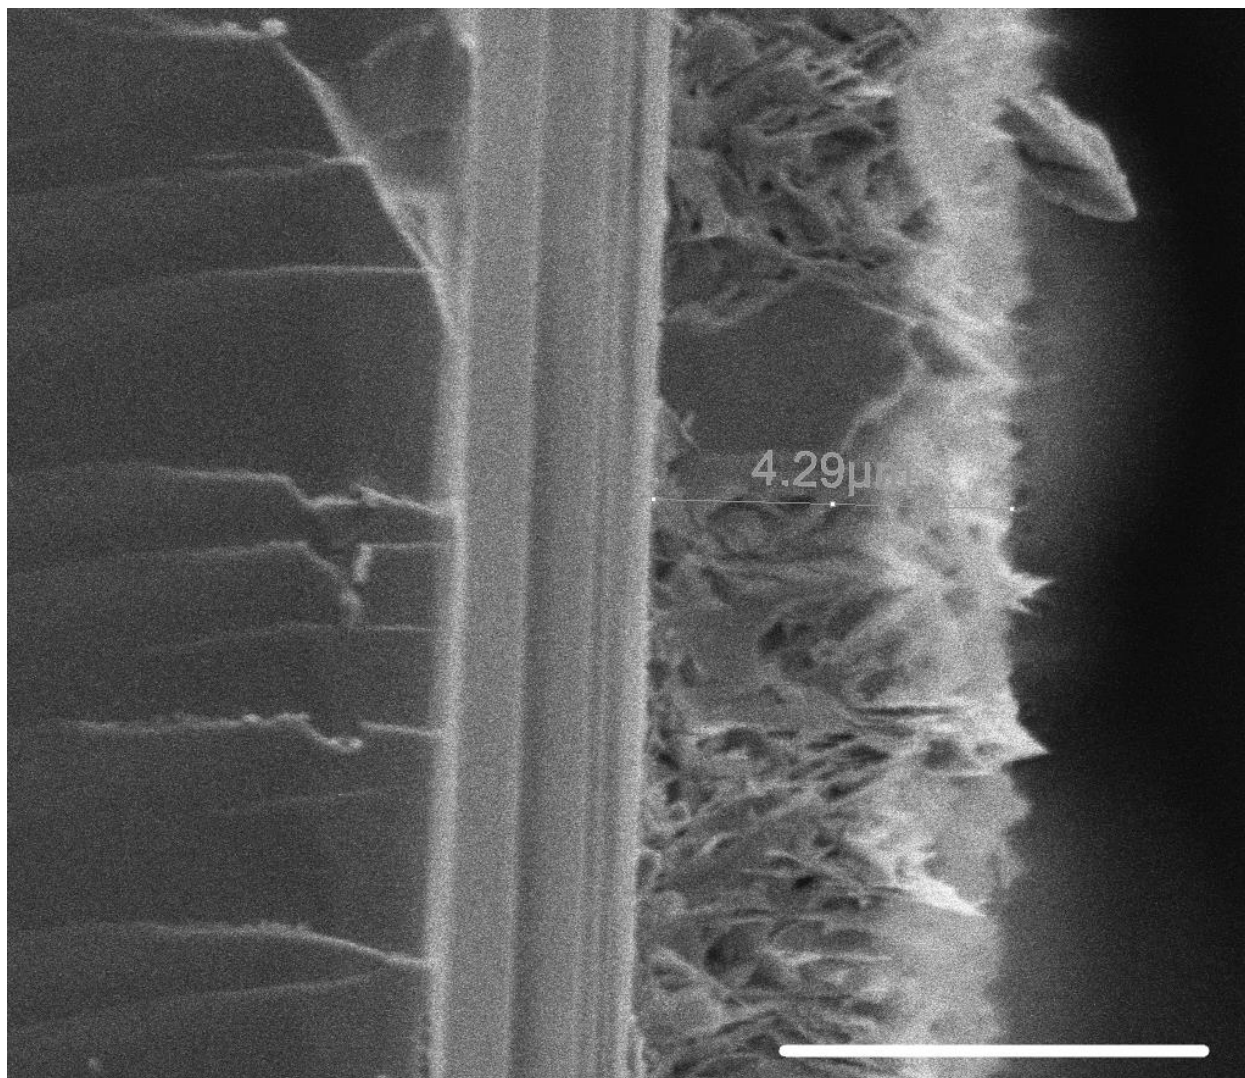

**Figure S-7.** Cross-sectional SEM image of the film deposited from **3** at 600 °C. The white scale bar in the bottom right is 5 μm in length. The measured film thickness was 4.29 μm.



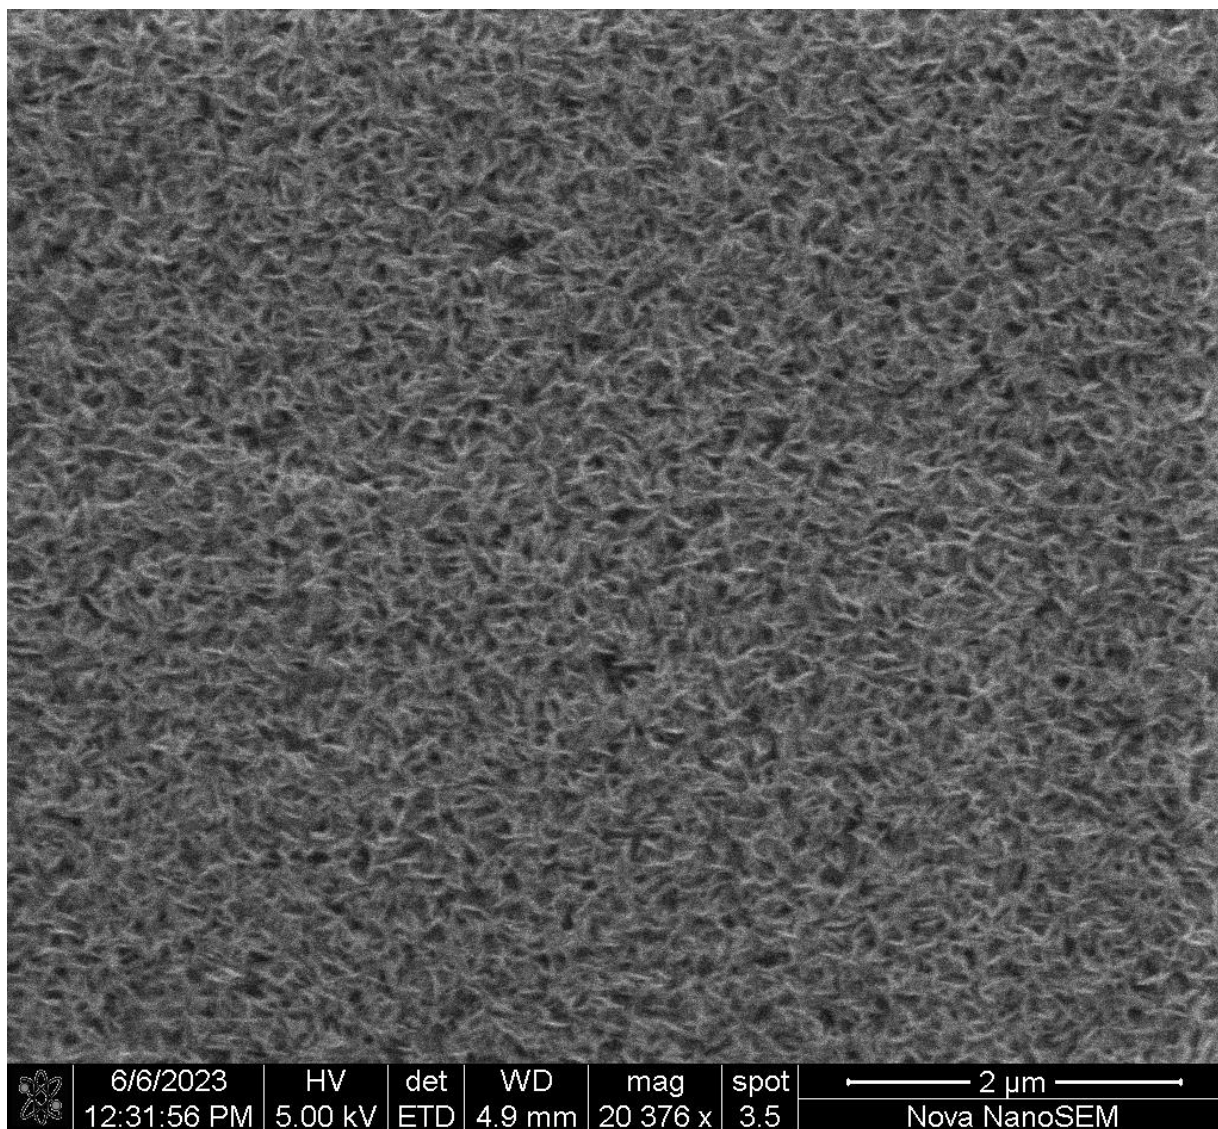

**Figure S-8.** Plane view SEM of the film deposited from **3** at 400 °C.

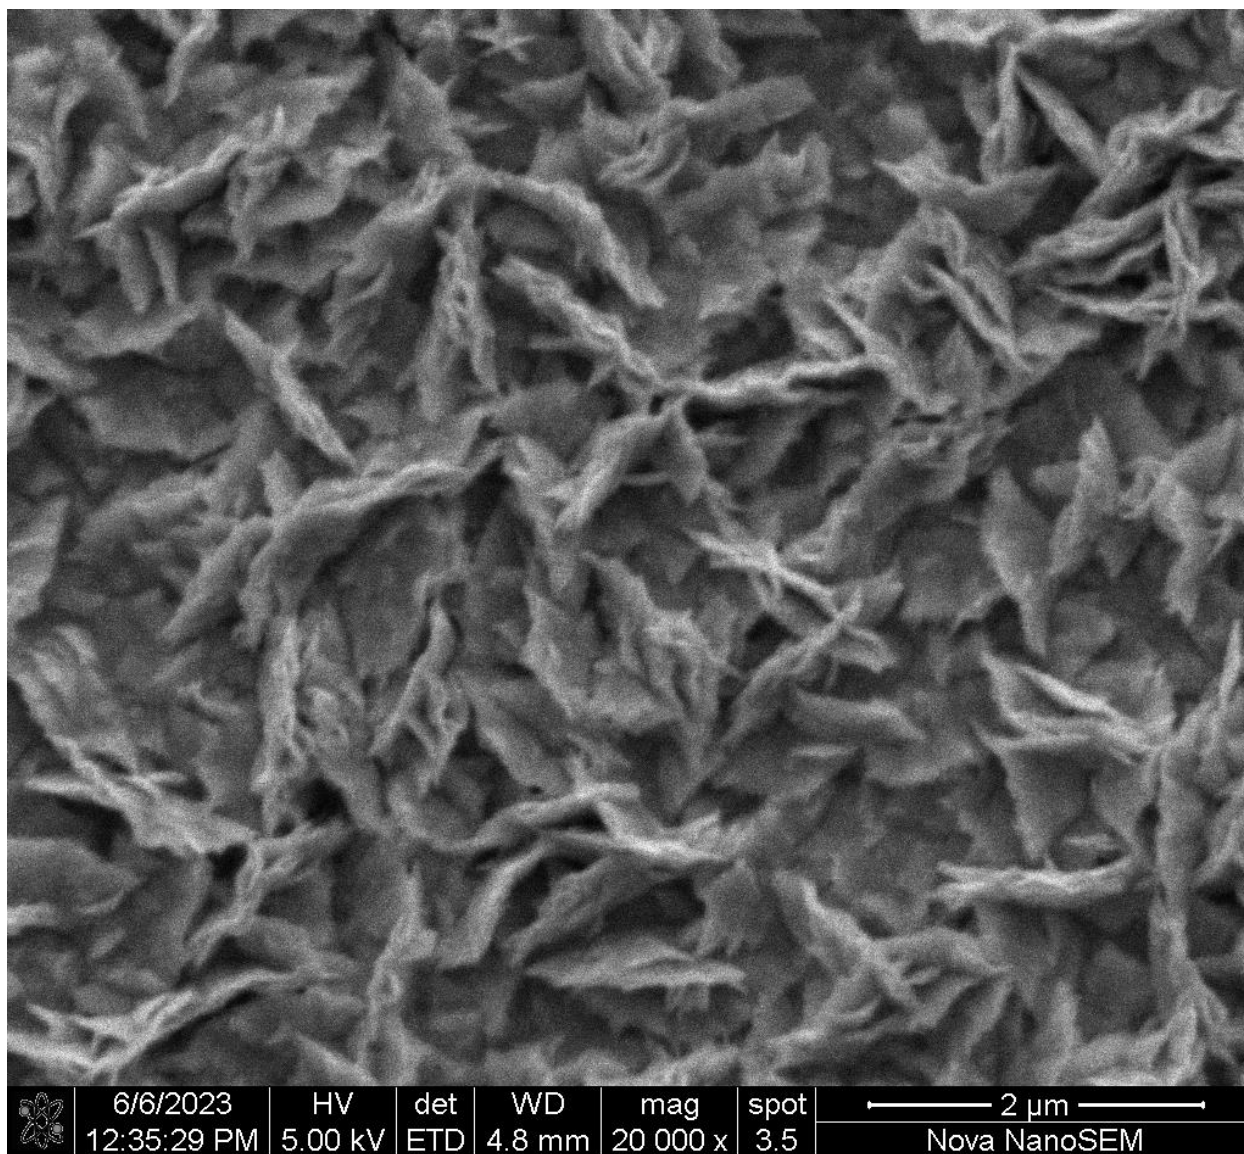

**Figure S-9.** Plane view SEM of the film deposited from **3** at 500 °C.
